# Supplementary material for: Antibacterial Textile Based on Hydrolyzed Milk Casein
Source: PubMed Central journal article supplement (PMC7825562; doi:10.3390/ma14020251), 2021-01-06
Supplement: materials-14-00251-s001.pdf [file materials-14-00251-s001.pdf]

Supplementary Material

## Antibacterial Textile Based on Hydrolyzed Milk Casein

Kedafi Belkhir <sup>1</sup>, Caroline Pillon <sup>2,3,4</sup>, Aurélie Cayla <sup>1</sup> and Christine Campagne <sup>1,\*</sup>

<sup>1</sup> ENSAIT, GEMTEX—Laboratoire de Génie et Matériaux Textiles, F-59000 Lille, France; kedafi.belkhir@centraledelille.fr (K.B.); aurelie.cayla@ensait.fr (A.C.)

<sup>2</sup> Université de Lyon, F-42023 Saint Etienne, France; caroline.pillon@univ-st-etienne.fr

<sup>3</sup> CNRS, UMR5223, Ingénierie des Matériaux Polymères, F-42023 Saint-Etienne, France

<sup>4</sup> Université Jean Monnet de Saint Etienne, F-42023 Saint-Etienne, France

\* Correspondence: christine.campagne@ensait.fr

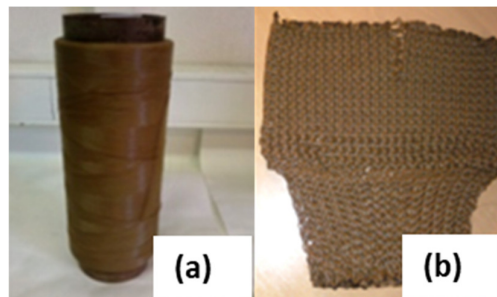

**Figure S1.** (a) The yarn obtained by melt spinning of PP containing 5 wt.% hydrolyzed casein. (b) The knit made of the yarn.

**Citation:** Belkhir, K.; Pillon, C.; Cayla, A.; Campagne, C. Antibacterial Textile based on Hydrolyzed Milk Casein. *Materials* **2021**, *14*, 251. <https://doi.org/10.3390/ma14020251>

Received: 18 December 2020

Accepted: 4 January 2021

Published: 6 January 2021

**Publisher's Note:** MDPI stays neutral with regard to jurisdictional claims in published maps and institutional affiliations.

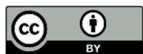

**Copyright:** © 2021 by the authors. Licensee MDPI, Basel, Switzerland. This article is an open access article distributed under the terms and conditions of the Creative Commons Attribution (CC BY) license (<http://creativecommons.org/licenses/by/4.0/>).

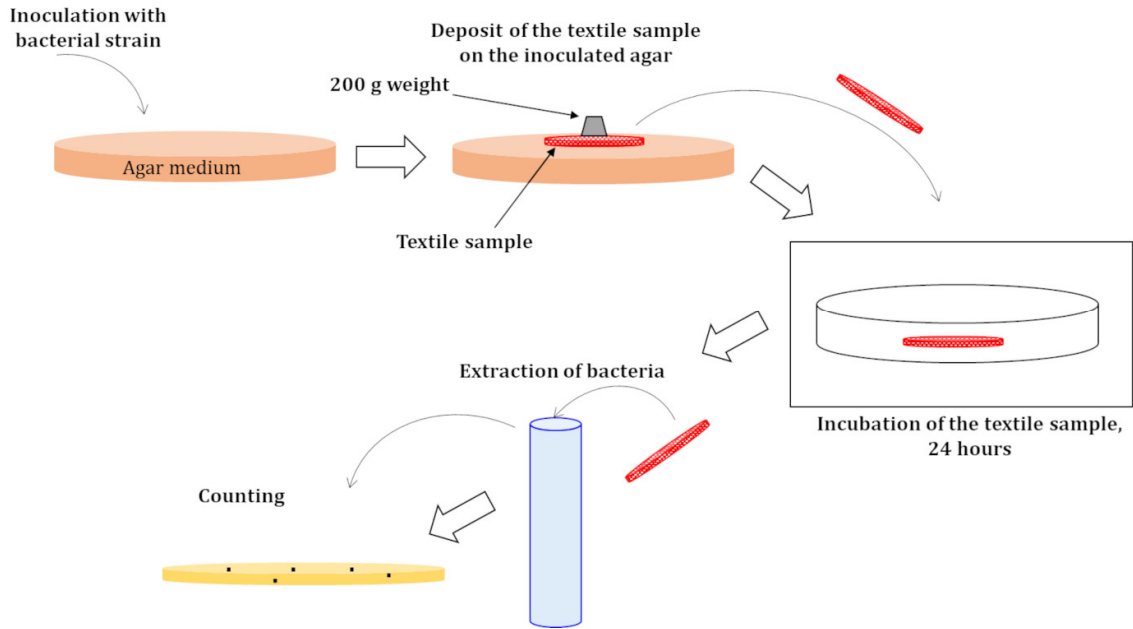

**Figure S2.** Schematic representation of the followed steps during the antibacterial tests, according to the ISO 20743 §8.2 (2013) norm.

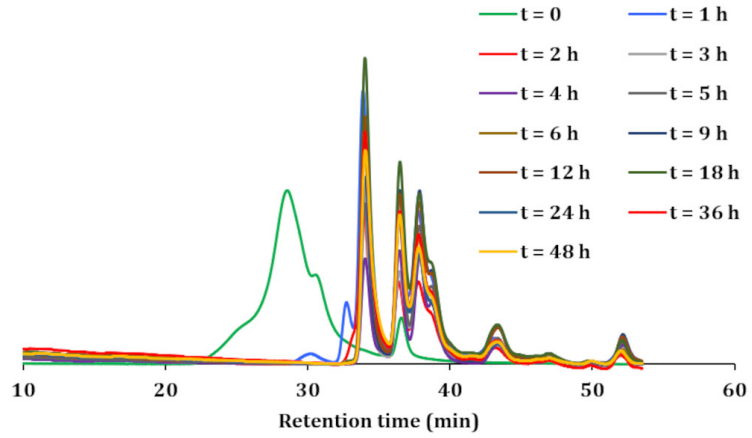

**Figure S3.** SEC traces casein at different times of hydrolysis.

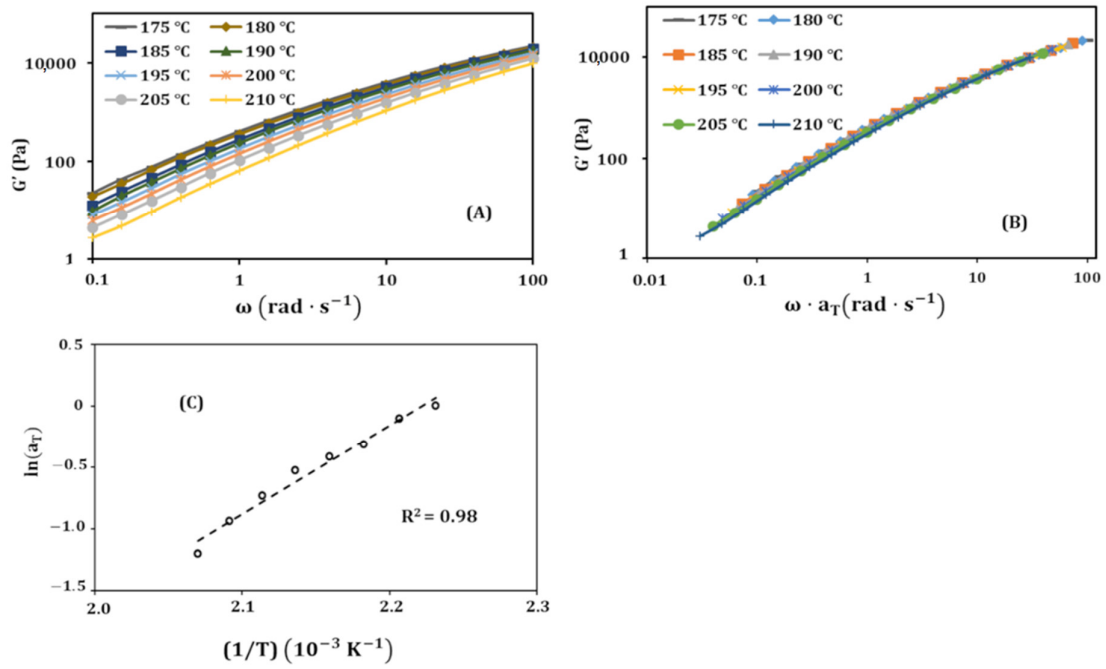

**Figure S4.** Neat PP rheological study. (A) Storage modulus at different temperatures. (B) Superposition of  $G'$  using a thermal shift factor  $a_T$ . (C)  $E_a$  determination from the plot of  $\ln(a_T)$  versus  $(1/T)$ .

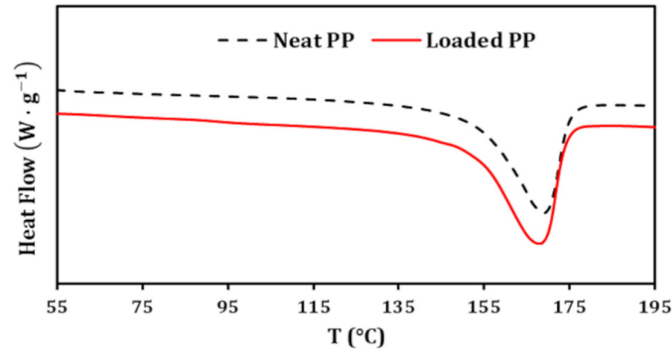

**Figure S5.** DSC curves corresponding to the first heating ramp, for neat PP and 5 wt.% loaded one.

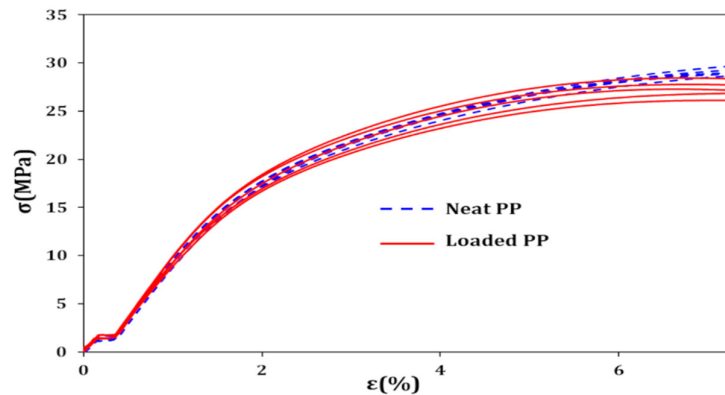

**Figure S6.** Stress-strain curves, from tensile tests, for the neat PP (five runs) and the PP loaded with 5wt.% hydrolyzed casein (five runs).

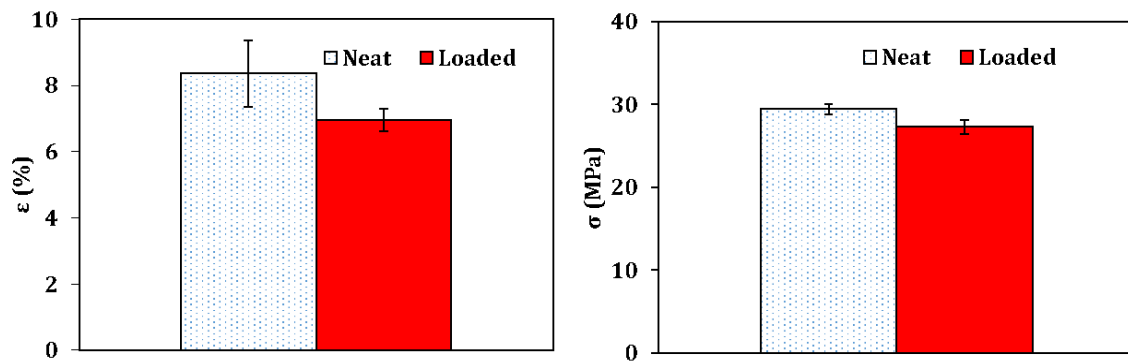

**Figure S7.** Strain ( $\epsilon$ ) and stress ( $\sigma$ ) values from tensile tests achieved on dumbbells of neat PP (Neat) or 5 wt.% hydrolyzed casein loaded PP (Loaded).
